# Supplementary material for: All-solid-state nanocomposite electrolytes composed of an ionic polymer with polar groups and surface-modified SiO2 nanoparticles for dye-sensitized solar cells
Source: Royal Society of Chemistry journal article supplement (doi:10.1039/c6ra12787h), 2016-01-01
Supplement: c6ra12787h1.pdf [file c6ra12787h1.pdf]

Supplementary information

**All-Solid-State Nanocomposite Electrolytes Composed of an  
Ionic Polymer with Polar Groups and Surface-Modified  
SiO<sub>2</sub> Nanoparticles for Dye-Sensitized Solar Cells**

Qizhang Huang,<sup>a,b</sup> Jifu Shi,<sup>a,\*</sup> Xueqing Xu,<sup>a</sup> Leilei Wang,<sup>a</sup> Liuwen Zhong,<sup>a</sup>

Yaoming Sun,<sup>a</sup> Hai Wang,<sup>a</sup> Gang Xu,<sup>a</sup> and Yanqing Ge<sup>c</sup>

<sup>a.</sup> *Key Laboratory of Renewable Energy, Guangzhou Institute of Energy Conversion,  
Chinese Academy of Sciences, Guangzhou 510640, China.*

<sup>b.</sup> *University of Chinese Academy of Sciences, Beijing 100049, China.*

<sup>c.</sup> *School of Chemical Engineering, Taishan Medical University, Taian 271000,  
China.*

\* Corresponding author. Email address: [shijf@ms.giec.ac.cn](mailto:shijf@ms.giec.ac.cn)

**Fig. S1** shows the TEM images of SiO<sub>2</sub> nanoparticles in sizes of 7-10 nm and 20-30 nm. **Fig. S1a** shows KH550-modified SiO<sub>2</sub> in size of 7-10 nm, where the inset on the left-top side is the naked SiO<sub>2</sub> nanoparticles in size of 7-10 nm. KH570-modified SiO<sub>2</sub> nanoparticles in size of 20-30 nm are shown in **Fig. S1b**, where the inset on the left-top side is the naked SiO<sub>2</sub> nanoparticles in size of 20-30 nm.

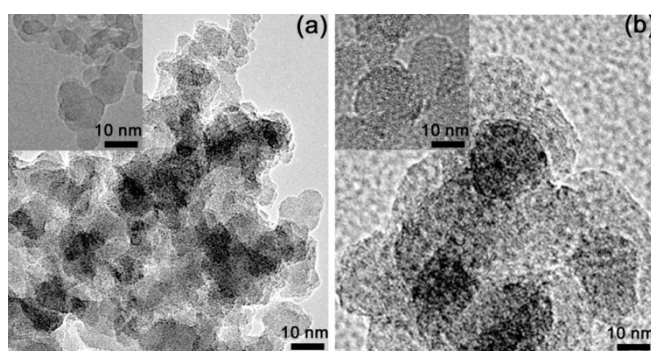

**Fig. S1** TEM images of (a) modified SiO<sub>2</sub> in sizes of 7-10 nm with the inset of naked SiO<sub>2</sub> in sizes of 7-10 nm and (b) modified SiO<sub>2</sub> in sizes of 20-30 nm with the inset of naked SiO<sub>2</sub> in sizes of 20-30 nm.

**Fig. S2** shows the FT-IR spectra of 2,3-dichloropropionic and ionic polymer. The band at about 630 cm<sup>-1</sup> is attributed to the vibration of –COOR. The characteristic peak at 704 cm<sup>-1</sup> is ascribed to C-Cl bond. The peaks at ~770 cm<sup>-1</sup>, ~840 cm<sup>-1</sup>, ~900 cm<sup>-1</sup>, and ~1000 cm<sup>-1</sup> are attributed to the vibration of C-H, C-O-C, C-N, and stretching vibration of C-O, respectively.

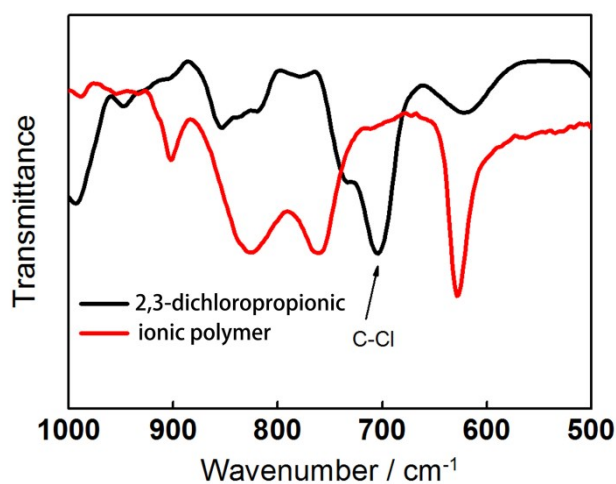

**Fig. S2** FT-IR spectra of 2,3-dichloropropionic and ionic polymer.

**Fig. S3** shows the TGA curves of modified SiO<sub>2</sub> particles. Modified SiO<sub>2</sub> particles (a-KH570, b-KH570, and a-KH550) do not have a distinct weight loss before 200 °C. For modified SiO<sub>2</sub> particles of the same size (7-10 nm), the weight loss of a-KH550 and a-KH570 from 200 to 800 °C are 8.05 wt% and 9.08 wt%, respectively. The weight loss of b-KH570 from 200 to 800 °C (in size of 20-30 nm) is 7.14 wt%.

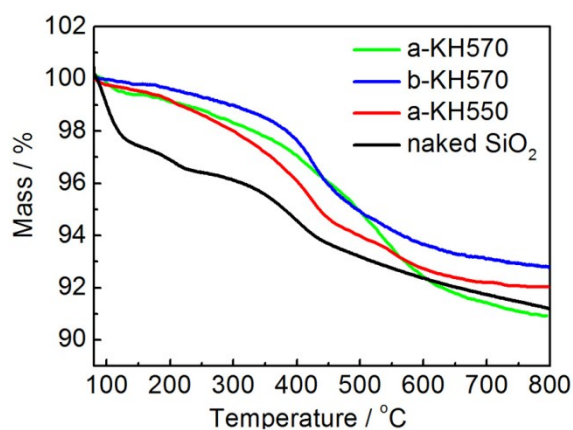

**Fig. S3** TGA curves of a-KH570, b-KH570, and a-KH550.
